# Supplementary material
Source: publisher figshare collection journal article supplement (https://frontiersin.figshare.com/ndownloader/files/13812497)
Supplement: Supplementary file [file 13812497]

| <i>P. damsela</i><br>subsp. <i>damsela</i> | disruption in<br><i>cheA</i> gene | Reference          | toxins produced by the<br>strains | Description                                                                                                                                        |
|--------------------------------------------|-----------------------------------|--------------------|-----------------------------------|----------------------------------------------------------------------------------------------------------------------------------------------------|
| AR272                                      | -                                 | this study         | PhlyP                             | AR57 with in-frame deletion of <i>hlyA<sub>pl</sub></i> , <i>hlyA<sub>ch</sub></i> and <i>dly</i> genes complemented with <i>hlyA<sub>pl</sub></i> |
| CDC 2227-81                                | -                                 | Kreger et al. 1984 | PhlyP, PhlyC, Dly                 | human isolate, Massachusetts United States 1981; Centers for Disease Control                                                                       |

Table S1: Additional strains used for supplemental data
